# Supplementary material for: Life Sentence: Mollusc Prisoner in Cretaceous Brachiopod Reconstructed in 3D. First Evidence for the Co-Existence of A Mollusc Inside a Living Animal
Source: Research Square preprint supplement (doi:10.21203/rs.3.rs-250566/v1), 2021-03-24
Supplement: Supplementary file 2 [file 410a38b3701774c164d14acc.xlsx]

## Sheet: Table2SectioningREV
	specimen number PAL 2019.7.1				Zittelina hofmanni Bujtor and Vörös, 2020
	Number of drawing sheet	Number of section drawing	Code of figure	Serial sectioning depth (reverse position)	Ventral (=pedicular) valve length	Dorsal (=crural) valve length	Entombed fossil length
	sheet 1	0		26.8 mm	0
		1		26.7 mm	0.1 mm
		2		26.6 mm	0.2 mm
		3		26.5 mm	0.3 mm
		4		26.4 mm	0.4 mm
		5		26.3 mm	0.5 mm
		6		26.25 mm	0.55 mm
		7		26.2 mm	0.6 mm
		8		26.1 mm	0.7 mm
		9		26.0 mm	0.8 mm
		10		25.9 mm	0.9 mm
		11		25.8 mm	1.0 mm
		12		25.7 mm	1.1 mm
		13		25.6 mm	1.2 mm
		14		25.5 mm	1.3 mm
		15		25,4 mm	1.4 mm
	sheet 2	16		25,3 mm	1.5 mm
		17		25,2 mm	1.6 mm
		18		25.1 mm	1.7 mm
		19		25.0 mm	1.8 mm
		20		24.9 mm	1.9 mm
		21		24.8 mm	2.0 mm
		22		24.7 mm	2.1 mm
		23		24.55 mm	2.25 mm
		24		24.4 mm	2.4 mm
		25		24.25 mm	2.55 mm
		26		24.1 mm	2.7 mm	0
		27	A	23.95 mm	2.85 mm	0.15 mm
	sheet 3	28		23.85 mm	2.95 mm	0.25 mm
		29		23.7 mm	3.1 mm	0.4 mm
		30	B	23.55 mm	3.25 mm	0.55 mm
		31		23.4 mm	3.4 mm	0.7 mm
		32		23.25 mm	3.55 mm	0.85 mm
		33		23.1 mm	3.7 mm	1.00 mm
	sheet 4	34	C	22.95 mm	3.85 mm	1.15 mm
		35		22.8 mm	4.0 mm	1.3 mm
		36		22.65 mm	4.15 mm	1.45 mm
		37		22.5 mm	4.3 mm	1.6 mm
		38	D	22.35 mm	4.45 mm	1.75 mm
		39		22.2 mm	4.6 mm	1.9 mm
	specimen number PAL 2019.7.1				Zittelina hofmanni Bujtor and Vörös, 2020
	Number of drawing sheet	Number of section drawing	Code of figure	Serial sectioning depth (reverse position)	Ventral (=pedicular) valve length	Dorsal (=crural) valve length	Entombed fossil length	Remarks
	sheet 5	40		22.05 mm	4.75 mm	2.05 mm
		41	E	21.9 mm	4.9 mm	2.2 mm
		42	F	21.7 mm	5.1 mm	2.4 mm	0.1 mm
		43	G	21.5 mm	5.3 mm	2.6 mm	0.3 mm
		44	H	21.3 mm	5.5 mm	2.8 mm	0.5 mm
	sheet 6	45	I	21.1 mm	5.7 mm	3.0 mm	0.7 mm
		46	J	20.9 mm	5.9 mm	3.2 mm	0.9 mm
		47	K	20.7 mm	6.1 mm	3.4 mm	1.1 mm
		48	L	20.5 mm	6.3 mm	3.6 mm	1.3 mm	Photo taken
		49	M	20.3 mm	6.5 mm	3.8 mm	1.5 mm
	sheet 7	50	N	20.1 mm	6.7 mm	4.0 mm	1.7 mm
		51	O	19.9 mm	6.9 mm	4.2 mm	1.9 mm
		52	P	19.7 mm	7.1 mm	4.4 mm	2.1 mm
		53	Q	19.5 mm	7.3 mm	4.6 mm	2.3 mm
		54	R	19.3 mm	7.5 mm	4.8 mm	2.5 mm
	sheet 8	55	S	19.1 mm	7.7 mm	5.0 mm	2.7 mm
		56	T	18.9 mm	7.9 mm	5.2 mm	2.9 mm
		57	U	18.7 mm	8.1 mm	5.4 mm	3.1 mm
		58	V	18.5 mm	8.3 mm	5.6 mm	3.3 mm
	sheet 9	59	W	18.3 mm	8.5 mm	5.8 mm	3.5 mm
		60	X	18.1 mm	8.7 mm	6.0 mm	3.7 mm
		61	Y	17.85 mm	8.95 mm	6.25 mm	3.95 mm
	sheet 10	62	Z	17.7 mm	9.1 mm	6.4 mm	4.1 mm
		63	AA	17.55 mm	9.25 mm	6.55 mm	4.25 mm	Photo taken
		64	AB	17.4 mm	9.4 mm	6.7 mm	4.4 mm
	sheet 11	65	AC	17.2 mm	9.6 mm	6.9 mm	4.6 mm
		66	AD	17.0 mm	9.8 mm	7.1 mm	4.8 mm
		67	AE	16.75 mm	10.05 mm	7.35 mm	5.05 mm
	sheet 12	68	AF	16.5 mm	10.3 mm	7.6 mm	5.3 mm
		69	AG	16.25 mm	10.55 mm	7.85 mm	5.55 mm
		70	AH	16.0 mm	10.8 mm	8.1 mm	5.8 mm
	sheet 13	71	AI	15.75 mm	11.05 mm	8.35 mm	6.05 mm
		72	AJ	14.75 mm	12.05 mm	9.35 mm	7.05 mm
		73	AK	14.0 mm	12.8 mm	10.1 mm	disappeared
	sheet 14	74		13.75 mm	13.05 mm	10.35 mm
		75	AL	13.00 mm	13.8 mm	11.1 mm
		76		12.00 mm	14.8 mm	12.1 mm
	sheet 15	77	AM	11.00 mm	15.8 mm	13.1 mm
	sectioning terminated due to disintegration of sample

## Sheet: Table1
	Table 1
	Dimensions of the serial sectioned specimen. L: length; W: width; T: thickness.
	specimen	L	W	T	length of crura
	PAL 2019.7.1	22.6	18.9	15.2	13.1
